1 **Identification of *Acinetobacter baumannii* loci for capsular polysaccharide**  
2 **(KL) and lipooligosaccharide outer core (OCL) synthesis in genome**  
3 **assemblies using curated reference databases compatible with Kaptive**

4

5

6 Kelly L. Wyres<sup>1</sup>, Sarah M. Cahill<sup>2</sup>, Kathryn E. Holt<sup>1,3</sup>, Ruth M. Hall<sup>4</sup>, Johanna J. Kenyon<sup>2\*</sup>

7

8 <sup>1</sup> *Department of Infectious Diseases, Central Clinical School, Monash University, Melbourne,*  
9 *Australia*

10 <sup>2</sup> *Institute of Health and Biomedical Innovation, School of Biomedical Sciences, Faculty of*  
11 *Health, Queensland University of Technology, Brisbane, Australia*

12 <sup>3</sup> *Department of Infection Biology, London School of Hygiene and Tropical Medicine, London,*  
13 *UK*

14 <sup>4</sup> *School of Life and Environmental Sciences, The University of Sydney, Sydney, Australia*

15

16

17

18 **Keywords:** *Acinetobacter baumannii*; *Kaptive*; capsular polysaccharide; K locus; outer-core  
19 oligosaccharide; OC locus

20

21

22 \* Correspondence: Johanna J. Kenyon, [johanna.kenyon@qut.edu.au](mailto:johanna.kenyon@qut.edu.au)

23

24

25 **Data Summary:**

26 1. Databases including fully annotated gene cluster sequences for *A. baumannii* K loci and  
27 OC loci are available for download at <https://github.com/katholt/Kaptive>

28 2. The *Kaptive* software, which can be used to screen new genomes against the K and O locus  
29 database is available at <https://github.com/katholt/Kaptive> (command-line code) and  
30 <http://kaptive.holtlab.net/> (interactive web service).

31 3. Details of the *Kaptive* search results validating *in silico* serotyping of K and O loci using  
32 our approach are provided as supplementary files, Dataset 1 (92 KL reference sequences and

- 33 12 OCL reference sequences), Dataset 2 (642 genomes assembled from reads available in
- 34 NCBI SRA) and Dataset 3 (3415 genome assemblies downloaded from NCBI GenBank).

35 **Abstract**

36 Multiply antibiotic resistant *Acinetobacter baumannii* infections are a global public health  
37 concern and accurate tracking of the spread of specific lineages is needed. Variation in the  
38 composition and structure of capsular polysaccharide (CPS), a critical determinant of  
39 virulence and phage susceptibility, makes it an attractive epidemiological marker. The outer  
40 core (OC) of lipooligosaccharide also exhibits variation. To take better advantage of the  
41 untapped information available in whole genome sequences, we have created a curated  
42 reference database of the 92 publicly available gene clusters at the locus encoding proteins  
43 responsible for biosynthesis and export of CPS (K locus), and a second database for the 12  
44 gene clusters at the locus for outer core biosynthesis (OC locus). Each entry has been  
45 assigned a unique KL or OCL number, and is fully annotated using a simple, transparent and  
46 standardised nomenclature. These databases are compatible with *Kaptive*, a tool for *in silico*  
47 typing of bacterial surface polysaccharide loci, and their utility was validated using a) >630  
48 assembled *A. baumannii* draft genomes for which the KL and OCL regions had been  
49 previously typed manually, and b) 3386 *A. baumannii* genome assemblies downloaded from  
50 NCBI. Among the previously typed genomes, *Kaptive* was able to confidently assign KL and  
51 OCL types with 100% accuracy. Among the genomes retrieved from NCBI, *Kaptive* detected  
52 known KL and OCL in 87% and 90% of genomes, respectively indicating that the majority of  
53 common KL and OCL types are captured within the databases; 13 KL were not detected in  
54 any public genome assembly. The failure to assign a KL or OCL type may indicate  
55 incomplete or poor-quality genomes. However, further novel variants may remain to be  
56 documented. Combining outputs with multi-locus sequence typing (Institut Pasteur scheme)  
57 revealed multiple KL and OCL types in collections of a single sequence type (ST)  
58 representing each of the two predominant globally-distributed clones, ST1 of GC1 and ST2  
59 of GC2, and in collections of other clones comprising >20 isolates each (ST10, ST25, and  
60 ST140), indicating extensive within-clone replacement of these loci. The databases are  
61 available at <https://github.com/katholt/Kaptive> and will be updated as further locus types  
62 become available.

63  
64  
65  
66  
67  
68

69 **Impact statement**

70 The ability to identify and track closely related isolates is key to understanding, and  
71 ultimately controlling, the spread of multiply antibiotic resistant *A. baumannii* causing  
72 difficult to treat infections, which are an urgent public health threat. Extensive variation in  
73 the KL and OCL gene clusters responsible for biosynthesis of capsule and the outer core of  
74 lipooligosaccharide, respectively, are potentially highly informative epidemiological markers.  
75 However, clear, well-documented identification of each variant and simple-to-use tools and  
76 procedures are needed to reliably identify them in genome sequence data. Here, we present  
77 curated databases compatible with the available web-based and command-line *Kaptive* tool to  
78 make KL and OCL typing readily accessible to assist epidemiological surveillance of this  
79 species. As many bacteriophage recognise specific properties of the capsule and attach to it,  
80 capsule typing is also important in assessing the potential of specific phage for therapy on a  
81 case by case basis.  
82

## 83 **Introduction**

84 One of the most imminent global health crises is the increasing prevalence and global  
85 dissemination of highly resistant bacterial pathogens that are able to persist in hospital  
86 environments despite infection control procedures. In 2017, the World Health Organisation  
87 identified carbapenem-resistant strains of the opportunistic Gram-negative bacterium,  
88 *Acinetobacter baumannii*, as a critical priority for therapeutics development due to alarming  
89 levels of resistance against nearly all clinically suitable antibiotics (1). The success of  
90 extensively antibiotic resistant *A. baumannii* isolates can be attributed, in part, to the  
91 evolution and expansion of well adapted clonal lineages (2-5), including the two major  
92 globally disseminated clones, Global Clone 1 (GC1) and Global Clone 2 (GC2), and other  
93 lineages that are found less frequently (e.g. sequence type 25; ST25) or on only one or two  
94 continents (e.g. ST78) (6). Hence, the development of precise epidemiological tracking  
95 methods for *A. baumannii* isolates, in particular those from important clonal lineages, are  
96 urgently needed to enhance surveillance and improve our understanding of how *A. baumannii*  
97 circulates both locally and globally.

98 Traditionally, epidemiological studies tracing important bacterial lineages associated  
99 with human and animal infections used serological typing of the polysaccharides produced on  
100 the cell surface (7, 8), as there can be significant variation in structures observed on different  
101 isolates of the same species (9-12). The cell-surface polysaccharides targeted in these  
102 schemes included capsular polysaccharide (CPS, K, or capsule) and/or O-antigen  
103 polysaccharide (OPS or O) that is attached to lipooligosaccharide (LOS) forming a  
104 lipopolysaccharide (LPS). In early studies, an *A. baumannii* serological typing scheme was  
105 developed for a major immunogenic polysaccharide, believed at the time to be the O antigen  
106 (13, 14), and 38 different serovars were included in the last update to the scheme nearly two  
107 decades ago (15). However, this system is no longer used.

108 In the last decade, it has been shown that the major immunogenic polysaccharide  
109 produced by the species is CPS not O antigen (16-18). The CPS of *A. baumannii* is a major  
110 virulence determinant as isolates lacking CPS do not cause infections (17). CPS is also a key  
111 target of potential novel control strategies including phage therapy (19, 20) and vaccinations  
112 (21, 22). Unfortunately, the current lack of knowledge about capsule diversity and  
113 epidemiology in the broader *A. baumannii* population, and lack of tools to readily detect  
114 changes in the population distribution hinders effective design of these controls.

115 Most of the genes that direct the synthesis of the CPS are clustered at the K locus  
116 (KL) that is located between the *fkpA* and *lldP* genes in the *A. baumannii* chromosome (16,

117 23). The general arrangement of the K locus features three main regions (Figure 1A). On one  
118 side, a module of genes for CPS export machinery (*wza-wzb-wzc*) are in a separate operon,  
119 divergently transcribed from the remainder of the gene cluster. On the other side lies a  
120 module of genes involved in the synthesis of simple sugar substrates. However, the *gneI*  
121 gene can be lost (e.g. Figure 2B) if D-GalpNAc is not present in the CPS, and various other  
122 genes have been found between *gne* (or *gpi*) and *pgm* in some KL (24-26). The genetic  
123 content of the central region is specific to the CPS structure produced. It includes genes for  
124 the required number of glycosyltransferases, and the capsule processing genes (*wzx* and *wzy*).  
125 If complex sugars (e.g. pseudaminic acid, legionaminic acid, acinetaminic acid,  
126 bacillosamine, etc.) are included in the CPS, the central region will also contain genes for the  
127 synthesis and modification of these sugars (16, 27-30). Each distinct gene cluster, defined by  
128 a difference in gene content between *fkpA* and *lldP*, is assigned a unique identifying number  
129 (KL1, KL2, etc.). To date, more than 128 KL gene clusters (KL types) have been identified at  
130 the K locus in *A. baumannii* genomes (31).

131 A transparent nomenclature system for CPS biosynthesis genes in *A. baumannii* was  
132 developed in 2013 to clearly identify the specific function of KL-encoded proteins for the  
133 non-export (16). Where possible, gene names indicate enzyme function (i.e. Gtr assigned to  
134 GlycosylTRansferases and Itr to the transferases initiating K unit synthesis). For enzymes  
135 (e.g., Gtrs and Itrs) where sequence differences likely result in a change of substrate  
136 preference, a number indicating the different sequence type (cut off value of 85% aa  
137 sequence identity) is included in the name as a suffix. The current gene names are listed in  
138 Table 1. Most published annotations use this system (e.g. refs 26, 29-36). However,  
139 sometimes other nomenclature systems have been used (23, 37).

140 A second locus with variable gene content involved in the production of a surface  
141 polysaccharide (16) has been shown to be responsible for synthesis of the outer-core (OC)  
142 component of the LOS (38). The OC locus (OCL) is located in the chromosome between the  
143 *aspS* and *ilvE* genes (16, 39). Each distinct gene cluster found between the flanking genes is  
144 assigned a unique number identifying the locus type (OCL1, OCL2, etc.), and to date, 14  
145 different gene clusters (OCL1-12 (39) and OCL15-16 (40) have been identified.  
146 Nomenclature for OCL genes is also shown in Table 1, and Gtrs encoded at the OC locus are  
147 differentiated from KL-encoded Gtrs by the addition of OC to the name (GtrOC#). Generally,  
148 OC gene clusters fall into two broad families (Figure 1B), designated Group A and Group B,  
149 defined by the presence of *pda1* and *pda2* genes, respectively (39).

150 Several studies have highlighted the extremely plastic nature of the *A. baumannii*  
151 genome, revealing very poor correlation between KL and OCL types and other genomic  
152 features including sequence type (2, 16, 23, 41-43). Therefore, the most valuable framework  
153 for tracing important genetic lineages of *A. baumannii* currently involves a combination  
154 approach, including phylogenetic analysis with multi-locus sequence typing (MLST) using  
155 both Institut Pasteur and Oxford schemes, resistance and virulence gene mapping, and K and  
156 OC locus typing (2, 40-43). Bioinformatics tools and databases currently exist for MLST and  
157 resistance gene typing, allowing multiple genomes to be processed quickly. However, the  
158 lack of computational tools and databases to rapidly extract interpretable, actionable  
159 information about K- and OC- loci from large data sets is a current bottleneck.

160 Recently, a computational tool, named *Kaptive*, was developed to rapidly identify  
161 reference K and O loci in *Klebsiella pneumoniae* species complex genome sequences taking  
162 as input a curated database of reference sequences and a query genome assembly (44, 45).  
163 Though the computational tool can be used to type loci in any species, a complete and  
164 curated compendium of appropriate, species-specific KL, OL or OCL sequences is needed. In  
165 the case of *A. baumannii*, such databases are not currently available.

166 Here, we present curated databases of annotated reference sequences for *A. baumannii*  
167 K and OC loci that are compatible with *Kaptive*, enabling rapid typing of genomes for this  
168 clinically significant pathogen. We evaluate the accuracy of this approach by comparison of  
169 K and OC locus calls for >630 genomes typed previously using manual methods.  
170 Additionally, we apply this approach to type >3300 *A. baumannii* genomes retrieved from the  
171 NCBI database, highlighting the extent of K and OC locus variability in the broader  
172 population and among clinically important clonal complexes, and confirming that the vast  
173 majority of genomes harbour loci matching those in our reference databases.

174

## 175 **Materials and Methods**

### 176 ***K and OC reference sequences***

177 Nucleotide sequences for reference isolates carrying each KL and OCL type were  
178 downloaded from NCBI non-redundant or WGS databases (accession numbers are listed in  
179 Tables S1 and S2). Where possible, whole genome sequences were assessed for the presence  
180 of the *A. baumannii*-specific *oxaAb* gene (GenBank accession number CP010781.1, base  
181 positions 1753305 to 1754129) to confirm the sequences were obtained from an *A.*  
182 *baumannii* isolate. A GenBank format file (.gbk) for each distinct locus type was prepared.  
183 This file includes the nucleotide reference sequence for the locus without flanking sequence,

184 the annotations of all coding sequences in the locus, and citation(s) for the annotations and/or  
185 polysaccharide structural data, if available.

186

### 187 ***Curated Kaptive databases***

188 The individual KL files were concatenated into a multi-record GenBank-format file to  
189 produce a data set containing annotated KL reference sequences. Likewise, the OCL files  
190 were compiled to generate a separate data set. Both reference databases were integrated with  
191 the *Kaptive-Web* platform (<http://kaptive.holtlab.net/>), which enables users to submit their  
192 genome sequence queries to a browser and receive the output in a visual format, as described  
193 in detail previously (45). The KL and OCL databases have also been made freely available  
194 for download from the *Kaptive* github repository (<https://github.com/katholt/Kaptive>) for use  
195 with the command-line version of *Kaptive* (44), or other tools.

196

### 197 ***Genome sequence collections***

198 *Acinetobacter* genome assemblies from our collection for which the KL and OCL types had  
199 been previously determined via manual or automated sequence inspection (2, 41); and  
200 unpublished data) were used to assess the level of typing accuracy that could be achieved  
201 through the use of our novel databases with *Kaptive*. Paired-end Illumina read data (described  
202 in (2, 41) and available under BioProject accession PRJEB2801) were *de novo* assembled  
203 using SPAdes v 3.13.1 (46) and optimised with Unicycler v 0.4.7 (47). High-quality genome  
204 assemblies (n = 719) with a maximum contig number of 300 and minimum assembly length  
205 3.6 Mbp were included in the analysis (cut-offs determined empirically by manual inspection  
206 of the contig number and assembly length distributions, respectively). These assemblies were  
207 assessed for *oxaAb* presence using BLASTn (>95% nucleotide sequence identity and >90%  
208 combined coverage) to confirm the *A. baumannii* species assignment. Confirmed *A.*  
209 *baumannii* sequences (n = 642) were analysed using both KL and OCL reference databases  
210 with command-line *Kaptive* v 0.7 (44) with default parameters.

211 The same method was used to test databases against 3412 genome sequences  
212 available in the NCBI non-redundant and WGS databases as of February 2019. These  
213 genome assemblies were bulk downloaded from NCBI as a compressed .tar file for local  
214 analysis. Genomes lacking *oxaAb* were removed prior to typing but quality control (QC)  
215 analysis as described above was applied to this data set only after typing was complete.

216



## 217 ***Interpretation of Kaptive output***

218 The *Kaptive* output is described in detail elsewhere (45). Briefly, *Kaptive* uses a combination  
219 of BLASTn and tBLASTn searches to identify the best matching reference locus for each  
220 query genome and indicates a corresponding confidence level. The latter is dependent on the  
221 BLASTn coverage and identity for the full-length reference locus, the number of reference  
222 locus genes (expected genes) or other genes (unexpected genes) found within the locus region  
223 of the query genome (determined by tBLASTn, default coverage cut-off  $\geq 90\%$ , identity  
224  $\geq 80\%$ ), and whether the locus is found on a single or multiple assembly contigs. A ‘perfect’  
225 confidence match indicates that the locus was found in the query genome on a single contig  
226 with 100% coverage and 100% nucleotide identity to the best-match reference locus. ‘Very  
227 high’ confidence matches are those for which the locus is present in the query genome in a  
228 single assembly contig with  $\geq 99\%$  coverage and  $\geq 95\%$  nucleotide sequence identity to the  
229 best-match reference locus, and no missing or unexpected genes within the locus. ‘High’  
230 confidence matches are defined as those for which the locus was found on a single contig  
231 with  $\geq 99\%$  coverage to the best-match reference locus,  $\leq 3$  missing genes and no unexpected  
232 genes within the locus. ‘Good’ confidence matches indicate that the locus was found on a  
233 single contig or split across multiple assembly contigs with  $\geq 95\%$  coverage to the best-match  
234 locus,  $\leq 3$  missing genes and  $\leq 1$  unexpected gene within the locus. ‘Low’ confidence  
235 matches indicate that the locus was found on a single contig or split across multiple assembly  
236 contigs with  $\geq 90\%$  coverage to the best-match locus,  $\leq 3$  missing genes and  $\leq 2$  unexpected  
237 genes within the locus. A confidence level of ‘None’ indicates that the match does not meet  
238 the criteria for any other confidence level.

239

## 240 ***Distribution of K and OC loci***

241 For NCBI genome assemblies, sequence types (STs) were assigned with the mlst script  
242 ([github.com/tseeman/mlst](https://github.com/tseeman/mlst)) using the Insitut Pasteur scheme for *A. baumannii* (abaumannii\_2  
243 scheme) available at [https://pubmlst.org/bigdb?db=pubmlst\\_abaumannii\\_pasteur\\_seqdef](https://pubmlst.org/bigdb?db=pubmlst_abaumannii_pasteur_seqdef).  
244 KL and OCL variation were visualised for STs with  $\geq 20$  isolate representatives with ‘good’  
245 or better confidence matches called by *Kaptive*.

246

## 247 **Results**

### 248 ***KL and OCL numbering and nomenclature***

249 The development of curated databases for numbered and fully annotated *A. baumannii* K-  
250 and OC- loci relies on the consistent application of a standardised nomenclature and  
251 numbering system for these loci. Here, the system developed for transparent annotation of  
252 both the K and OC loci (16) has been used. As new KL and OCL types with additional gene  
253 families have been discovered since 2013, the gene nomenclature has been extended and is  
254 summarised in Table 1. For consistency, K loci that were originally published using other  
255 nomenclatures or typing systems have been re-annotated, and where possible the  
256 corresponding GenBank entries have been updated with the permission of the original  
257 authors (see Table S1).

258 In several cases, KL types that differ only by a small portion of the locus have been  
259 found e.g. (16, 48) and examples are shown in Figure 2. In cases where structures have been  
260 determined, the locus difference is associated with changes in the composition or structure of  
261 the CPS (26, 27, 29, 31, 35, 49-54) but some locus differences are now known to have no  
262 effect on CPS structure (24, 55). As all differences in genetic content are relevant in  
263 epidemiological studies, all K loci comprising a unique combination of genes were  
264 distinguished with a new KL number.

265

### 266 ***The curated KL reference database***

267 The annotations for 92 of 128 KL types are publicly available. Curated annotations have been  
268 deposited into GenBank for 78 KL types, three of which were submitted as third party  
269 annotations (TPA) (see Table S1). An additional 14 sequences were extracted from genomes  
270 in the WGS database (see Table S1). Sequences for the remaining 37 KL types are not  
271 currently available in the public domain.

272 Complete annotations for the 92 publicly available *A. baumannii* K locus reference  
273 sequences spanning the full length of each gene cluster (between *fkpA* and *lldP*) were  
274 therefore compiled into a KL reference database for use with *Kaptive*. Where the only  
275 available representative of a KL type included an insertion sequence (IS), we substituted the  
276 sequence with a manually generated version with the IS and target site duplication removed  
277 in order to include a KL that represents the presumptive ancestral, non-modified sequence as  
278 is required for accurate typing by *Kaptive* (44). This was the case for KL types KL27, KL44,  
279 KL82, KL87, KL93, KL114, and KL118 (Table S1).

280

### 281 ***The curated OCL reference database***

282 The annotations for 12 different OCL types have been described in the literature (39). A  
283 complete list is found in Supplementary Table S2. However, only six of them were available  
284 in GenBank. The remaining six OCL sequences were identified in the WGS database, and the  
285 WGS accession numbers are available in Table S1. Complete annotations for the 12 publicly  
286 available OCL spanning the full length of the gene clusters (between *ilvE* and *aspS*) were  
287 combined into a single OCL reference database for use with *Kaptive*.

288

### 289 ***Compatibility of the KL and OCL databases with Kaptive***

290 To confirm the compatibility of the KL and OCL databases for *Kaptive*-based typing, we  
291 created two query sequence sets comprising FASTA sequences of the reference KL and  
292 OCL, respectively. *Kaptive* was applied to each of these query sets, and was able to  
293 successfully identify the correct locus in all cases (Dataset 1).

294

### 295 ***Comparison of Kaptive assignments with previous KL assignments***

296 We assessed the accuracy of *Kaptive*-based KL typing using our curated KL database by  
297 application to a collection of 642 *A. baumannii* genome assemblies (see Dataset 2), which  
298 had been typed previously using BLASTn plus manual inspection (2, 41; and unpublished  
299 data). For these assemblies, the confidence levels called by *Kaptive* were: 176 (perfect), 385  
300 (very high), 28 (high), 53 (good), 0 (low) and 0 (none) (Figure 3A; Dataset 2). Notably, 561  
301 matches were assigned ‘perfect’ or ‘very high’ confidence calls, demonstrating that *Kaptive*  
302 could very confidently assign a KL type to the majority (87.4%) of the 642 genome  
303 assemblies provided.

304 The 28 ‘high’ confidence matches each included one or more single base deletions  
305 within the locus leading to the interruption of a coding sequence, which *Kaptive* reports as  
306 one or more missing genes when the resulting tBLASTn matches have <90% coverage to the  
307 reference gene sequence. Such deletions may represent sequencing and/or assembly errors  
308 but may also represent true sequence variations with the potential to result in altered CPS  
309 structure. Since *Kaptive* is unable to distinguish these possibilities it reports the ‘missing’  
310 gene and lowered confidence score in order to alert the user and facilitate further  
311 investigation.

312 Manual inspection of the relevant assembly graphs showed that 50 of 53 (94.4%)  
313 assignments with a ‘good’ confidence level were locus variants in which an IS had  
314 interrupted the KL gene cluster breaking it into two or more contigs in the query genome.  
315 The three remaining assemblies that were typed with a ‘good’ confidence level were also

316 broken into multiple contigs that represented dead-ends in the assembly graphs, hence it was  
317 not possible to determine if these also represented IS variants or were simply the result of  
318 assembly problems e.g. due to low sequencing depth in the KL region of the genome.

319 Of the 642 assemblies with a KL type that was assigned previously, 641 (99.8%) were  
320 concordant and one (0.2%) was discrepant. The K locus of *A. baumannii* isolate BAL\_266  
321 had previously been described as KL63 (41). However, *Kaptive* assigned it to KL108 with a  
322 ‘very high’ confidence level (99.98% nucleotide sequence identity; 100% coverage). The  
323 sequence of this isolate was manually checked again and confirmed to be KL108. The KL63  
324 and KL108 gene clusters are 97.96% identical across 95% of the locus, differing from each  
325 other only in ~1.3 kb segment in the central region that includes the *wzy* gene (Figure 2A).  
326 This small difference between the two gene clusters was missed in the original manual typing  
327 but likely alters the linkage between the K units. This highlights the need to look for any  
328 regions of sequence difference when manually typing.

329

### 330 ***Comparison of Kaptive assignments with previous OCL assignments***

331 We also assessed the accuracy of OCL identification using our curated OCL database applied  
332 to the same collection of *A. baumannii* genomes. The OCL region of 631 of these had  
333 previously been typed using BLASTn plus manual inspection (2, 41; and unpublished data).  
334 The confidence levels for the OCL matches for the 631 typed genomes were: 124 (perfect),  
335 469 (very high), 5 (high), 33 (good), 0 (low) and 0 (none) (Figure 3A; Dataset 2). As for the  
336 KL database, the large number of ‘perfect’ and ‘very high’ confidence matches (593, 94.0%)  
337 demonstrate the capacity of the OCL database to type the majority of genome assemblies  
338 provided as a query. Manual inspection confirmed that the five ‘high’ confidence matches  
339 included those with one or more base deletions in coding sequences, and the 33 ‘good’  
340 matches represented variants of the corresponding reference sequences interrupted by one or  
341 more ISs. In this set, there were no discrepancies between the previous locus assignments and  
342 those determined by *Kaptive*.

343

### 344 ***Application of KL and OCL databases for A. baumannii genome typing***

345 As the KL and OCL regions in the majority of NCBI genome sequences have not yet been  
346 examined, the publicly available genomes provide a large dataset to begin to explore KL and  
347 OCL diversity in the species. Available genome assemblies of 3412 isolates annotated as *A.*  
348 *baumannii* in the NCBI non-redundant and WGS databases were first checked for the  
349 presence of the *oxaAb* gene to ensure correct assignment to the *baumannii* species. The

350 *oxaAb* gene was absent from 34 assemblies (0.99%), and these were removed from the  
351 analysis bringing the total number of assemblies examined to 3378.

352 For the KL database, the confidence levels of the matches called by *Kaptive* were:  
353 272 (perfect), 1901 (very high), 149 (high), 622 (good), 51 (low) and 383 (none). Among the  
354 2944 genomes with KL confidence matches ‘good’ or better, there were 79 distinct KL types,  
355 36 (45.6%) of which were identified in five or fewer genomes. Notably 13 of the loci  
356 included in the KL reference database were not identified among any of the genome  
357 assemblies retrieved from the NCBI database. The most common KL types were KL2 (713 of  
358 2948 genomes, 24.2%), KL9 (343, 11.6%), KL22 (330, 11.2%), KL3 (294, 10.0%) and KL13  
359 (155, 5.3%).

360 For the OCL database, the confidence levels were as follows: 108 (perfect), 2192  
361 (very high), 80 (high), 645 (good), 39 (low) and 314 (none) (Figure 3B; Dataset 3). All 12 of  
362 the reference OC loci were identified among the 3029 genomes with OCL confidence  
363 matches ‘good’ or better. Among these genomes the most common OCL types were OCL1  
364 (2086, 68.9%), OCL3 (272, 9.0%), OCL6 (157, 5.2%), OCL2 (150, 5.0%) and OCL5 (125,  
365 4.1%).

366 Therefore, among the *A. baumannii* genomes retrieved from NCBI, KL and OCL calls  
367 were obtained for 87% and 90% of the assemblies, respectively. However, ‘low’ and ‘none’  
368 confidence levels may result from poor quality sequence assembly and/or may indicate that a  
369 novel locus is present in the query assembly (44). Indeed, the application of the same quality  
370 control cutoff used for inclusion in our own data set (see above) revealed that 13/51 ‘low’  
371 and 174/387 ‘none’ confidence matches for the KL assignments may be assemblies of poor  
372 quality. Similarly, 12/39 ‘low’ and 76/314 ‘none’ confidence matches for the OCL  
373 assignments did not meet the same quality control cutoff. Hence, it is recommended that  
374 users perform additional investigations to confirm the quality of their assemblies before  
375 excluding ‘low’ and/or ‘none’ confidence matches from their analyses.

376

### 377 ***KL and OCL variation in clonal lineages***

378 Variation in the KL and OCL in the major multi-drug resistant clonal lineages have largely  
379 been examined using small datasets (e.g. (2, 16, 38, 39)). For the GC2 lineage, these studies  
380 assessed diversity amongst isolates predominantly recovered from the same outbreak or  
381 region (41-43) or sporadic isolates (26, 56), limiting the ability to gain a complete picture of  
382 surface polysaccharide variation in this clone. Across these studies, at least 14 KL and 5 OCL  
383 have been reported in GC2. Of the 3386 genome assemblies we analysed here, 2016

384 belonged to ST2 in the Institut Pasteur scheme, representing the most common ST in GC2  
385 and the largest group of isolates belonging to a single ST (6). Among the 2016 ST2 genomes,  
386 *Kaptive* identified 30 KL and 3 OCL (Figure 4) in those with confidence matches ‘good’ or  
387 better. The most common KL arrangements were KL2 (32.2%) and KL22 (14.4%), whereas  
388 OCL1 represented the most predominant OCL type (78.6%). Only one KL, KL63, was found  
389 in a single ST2 genome. For the remaining assemblies, 107 (5.3%) and 256 (12.7%) were  
390 assigned ‘low’ and ‘none’ confidence matches against the KL and OCL databases,  
391 respectively. These assemblies may be of poor quality or they may carry novel types but this  
392 was not further investigated.

393 KL and OCL diversity have also previously been reported for the other major clonal  
394 lineage, GC1. An in-depth study of 45 *A. baumannii* GC1 isolates identified 8 KL and 5 OCL  
395 types in this clone (2), with one additional KL type found in a subsequent study (57). In the  
396 set of 3386 genome assemblies, we found 134 that belong to ST1, which represents the most  
397 common GC1 sequence type. *Kaptive* identified a total of 10 KL and 6 OCL types in the ST1  
398 lineage (Figure 4), expanding the number of distinct types observed previously. Among these  
399 ST1 genomes, the most common KL types were KL1 (31.3%) and KL4 (18.7%), while the  
400 most common OCL were OCL1 (36.6%), OCL2 (17.2%) and OCL3 (29.1%). KL19 and  
401 KL42 and also OCL7 were found in single isolates.

402 We also examined a further seven STs for which there were  $\geq 20$  isolate  
403 representatives with confident *Kaptive* matches (‘good’ or better). Of these STs, ST10  
404 included the largest number of genome assemblies (47 of 3386 assemblies), and 4 KL and 1  
405 OCL type were found in this group. ST25, the second largest group with 46 assemblies had  
406 very high variation with 14 KL and 4 OCL types. ST406 (22 assemblies) also included 4  
407 OCL types but only 2 KL. However, one of two KL types and one or two OCL types were  
408 found in ST16 (20 assemblies), ST78 (29), ST499 (29) and ST636 (20). Notably, specific KL  
409 and OCL types were not confined to single STs, with several locus types found in more than  
410 one ST.

411

## 412 **Discussion**

413 In this study, we present *Kaptive* compatible databases of annotated reference sequences for  
414 *A. baumannii* K and OC loci, extending the utility of *Kaptive* and broadening the ability of  
415 researchers, clinicians and public health professionals to analyse genome data sets. Using  
416 these databases, *Kaptive* was able to confidently and accurately assign KL and OCL types to

417 the majority of *A. baumannii* genome assemblies examined. Among >630 *A. baumannii*  
418 genomes typed previously using manual methods, only a single discrepancy between the  
419 previous KL assignment and that of *Kaptive* was identified. This was traced to an error in the  
420 previous manual assignment which had overlooked a small genetic replacement within the  
421 locus. As sequence replacements of < 2 kb are common in *A. baumannii* KL and OCL  
422 regions (examples shown in Figure 2), the ability of *Kaptive* to correctly identify the KL type  
423 demonstrated the stringent nature of the tool and the quality of the databases described  
424 herein. The KL and OCL databases were also used to probe the collection of *A. baumannii*  
425 genome assemblies available through NCBI GenBank and WGS databases. *Kaptive* was able  
426 to confidently assign locus types to more than 87% of these genome assemblies, indicating  
427 that the databases capture the majority of common KL and OCL types. However, to confirm  
428 the locus calls, all *Kaptive* assignments should be checked for length discrepancies that  
429 would reveal missing expected genes, and/or the presence of additional genes or IS in the  
430 locus.

431         The remaining genomes that could not be confidently assigned a locus type (13% KL  
432 and 10% OCL unassigned) may include genomes with low coverage and/or poor assembly  
433 quality in the KL and/or OCL genome regions. Alternatively, these genomes may carry loci  
434 that are not represented in the current reference databases. In these cases, users are  
435 encouraged to undertake further investigations e.g. by manual inspection of the assembly  
436 and/or assembly graphs and comparisons to the best-matching reference loci using  
437 visualisation tools such as Artemis Comparison Tool (58) and Bandage (59). Further work  
438 will be needed to identify and include further novel loci and the databases will be  
439 continuously updated as sequences and annotations for further KL and OCL types become  
440 available. We encourage users to contact us via the *Kaptive-Web* website and/or the *Kaptive*  
441 github page to submit novel loci for the assignment of KL and OCL numbers and addition to  
442 the publicly available databases.

443         The typing system and the databases have been designed strictly for use in *A.*  
444 *baumannii* and therefore users are encouraged to check the origin of their sequences to ensure  
445 reliable results. The presence of the intrinsic *oxaAb* gene in the genome sequence can be  
446 applied as a simple check to confirm a sequence is from an *A. baumannii* isolate prior to use  
447 of the databases, bearing in mind that it may be missing from poor quality assemblies.  
448 However, this does not preclude the use of the *A. baumannii* KL and OCL databases on other  
449 species of *Acinetobacter*. Though not all locus types found in other species will be  
450 represented in the databases, K or OC loci with high similarity to those found among *A.*

451 *baumannii* can be easily identified (see examples in Dataset 3). Hence, the *A. baumannii*  
452 databases may assist identification and annotation of the specific genetic content of loci in  
453 other *Acinetobacter* species.

454 It should be noted that the KL does not predict the structure of the CPS, though it  
455 does include information about the possible number and identity of sugars present. The CPS  
456 structure for each KL must be determined directly as in a number of cases additional genes  
457 involved in capsule synthesis are found outside the locus (28, 51, 54). Hence the KL type is  
458 only a starting point for predicting if a particular isolate might be susceptible to a particular  
459 phage. However, the potential power of KL and OCL typing as epidemiological tools is  
460 highlighted by the analysis of KL and OCL found in single STs. KL and OCL typing have  
461 previously proven valuable in dissecting the evolution of two major global clones (2, 41-43).  
462 However, in most studies the genomes were typed using a time intensive manual process,  
463 which imposed a considerable limitation on the scale of datasets that could be explored. In  
464 contrast, in this work we were able to use the automated method implemented in *Kaptive* to  
465 type the K and OC loci of 1000s of genomes, including 134 GC1 and 2016 GC2 revealing  
466 even more extensive variation, which is likely to be driven by exchange of locus sequences  
467 via recombination in both clones. Given that the available genomes are drawn from a biased,  
468 convenience sample of genomes deposited in NCBI (6), they still may not reflect the true  
469 variation in these clones. Similar high levels of variation were found in two other clones  
470 (ST10 and ST25), suggesting that they are subject to similar molecular evolutionary  
471 processes. In contrast, there appeared to be limited KL and OCL variation among ST16,  
472 ST78, ST406, ST499 and ST636.

473 The findings reported here clearly demonstrate the utility of our novel KL and OCL  
474 databases to facilitate rapid and accurate typing of *A. baumannii* surface polysaccharide  
475 synthesis loci. This information can be used to distinguish lineages within the global clonal  
476 complexes (2, 41, 57) and hence provide valuable information for epidemiological studies, as  
477 well as essential information to guide the design of novel treatment or control strategies  
478 targeting *A. baumannii* capsules and lipooligosaccharides.

479

#### 480 **Conflicts of Interest**

481 The authors declare that there are no conflicts of interest.

482

#### 483 **Funding Information**



484 This work was supported by an Australian Research Council (ARC) DECRA Fellowship  
485 DE180101563 to JJK. KEH was supported by a Senior Medical Research Fellowship from  
486 the Viertel Foundation of Australia.

487 **References**

- 488 1. World Health Organisation (WHO). Global priority list of antibiotic-resistant bacteria to  
489 guide research, discovery, and development of new antibiotics. 2017. Available from:  
490 [https://www.who.int/medicines/publications/WHO-PPL-Short\\_Summary\\_25Feb-](https://www.who.int/medicines/publications/WHO-PPL-Short_Summary_25Feb-ET_NM_WHO.pdf)  
491 [ET\\_NM\\_WHO.pdf](https://www.who.int/medicines/publications/WHO-PPL-Short_Summary_25Feb-ET_NM_WHO.pdf).
- 492 2. Holt KE, Kenyon JJ, Hamidian M, Schultz MB, Pickard DJ, Dougan G, *et al.* Five  
493 decades of genome evolution in the globally distributed, extensively antibiotic resistant  
494 *Acinetobacter baumannii* global clone 1. *Microb. Genom.* 2016;2(2):e000052.
- 495 3. Diancourt L, Passet V, Nemeč A, Dijkshoorn L, Brisse S. The population structure of  
496 *Acinetobacter baumannii*: Expanding multiresistant clones from an ancestral susceptible  
497 genetic pool. *PLoS One.* 2010;5(4):e10034.
- 498 4. Sahl J, Del Franco M, Pournaras S, Colman R, Karah N, Dijkshoorn L, *et al.*  
499 Phylogenetic and genomic diversity in isolates from the globally distributed  
500 *Acinetobacter baumannii* ST25 lineage. *Sci. Rep.* 2015;5:15188.
- 501 5. Zarrilli Z, Pournaras S, Giannouli M, Tsakris A. Global evolution of multidrug-resistant  
502 *Acinetobacter baumannii* clonal lineages. *Int. J. Antimicrob. Agents* 2013;41:11-9.
- 503 6. Hamidian M, Nigro SJ. Emergence, molecular mechanisms and global spread of  
504 carbapenem-resistant *Acinetobacter baumannii*. *Microb. Genom.* 2019;5(10).
- 505 7. Orskov I, Orskov F, Jann B, Jann K. Serology, chemistry, and genetics of O and K  
506 antigens of *Escherichia coli*. *Bacteriol. Rev.* 1977;41(3):667-710.
- 507 8. Ørskov I, Ørskov F. Serotyping of *Klebsiella*. *Method. Microbiol.* 1984;14:143-64.
- 508 9. Liu B, Knirel YA, Feng L, Perepelov A, Senchenkova S, Wang Q, *et al.* Structure and  
509 genetics of *Shigella* O antigens. *FEMS Microbiol. Rev.* 2008;32:627-53.
- 510 10. Liu B, Knirel YA, Feng L, Perepelov A, Senchenkova S, Reeves PR, *et al.* Structural  
511 diversity in *Salmonella* O antigens and its genetic basis. *FEMS Microbiol. Rev.*  
512 2014;38(1):56-89.
- 513 11. Kenyon JJ, Cunneen MM, Reeves PR. Genetics and evolution of *Yersinia*  
514 *pseudotuberculosis* O-specific polysaccharides: a novel pattern of O-antigen diversity.  
515 *FEMS Microbiol. Rev.* 2017;41(2):200-17.
- 516 12. Stenutz R, Weintraub A, Widmalm G. The structures of *Escherichia coli* O-  
517 polysaccharide antigens. *FEMS Microbiol. Rev.* 2006;30(3):382-403.
- 518 13. Traub W. *Acinetobacter baumannii* serotyping for deliniation of outbreaks of nosocomial  
519 cross-infection. *J. Clin. Microbiol.* 1989;27(12):2713-6.

- 520 14. Pantophlet R. Lipopolysaccharides of *Acinetobacter*. In: Gerischer U, editor.  
521 *Acinetobacter* Molecular Microbiology. Norfolk, UK: Horizon Scientific Press; 2008.
- 522 15. Traub W, Bauer D. Surveillance of nosocomial cross-infections due to three  
523 *Acinetobacter* genospecies (*Acinetobacter baumannii*, genospecies 3 and genospecies  
524 13) during a 10-year observation period: serotyping, macrorestriction analysis of  
525 genomic DNA and antibiotic susceptibilities. *Chemother.* 2000;46:282-92.
- 526 16. Kenyon JJ, Hall RM. Variation in the complex carbohydrate biosynthesis loci of  
527 *Acinetobacter baumannii* genomes. *PLoS One.* 2013;8(4):e62160.
- 528 17. Russo TA, Luke N, Beanan J, Olson R, Sauberan S, MacDonald U, et al. The K1  
529 capsular polysaccharide of *Acinetobacter baumannii* strain 307-0294 is a major virulence  
530 factor. *Infect. Immun.* 2010;78(9):3993-4000.
- 531 18. Fregolino E, Gargiulo V, Lanzetta R, Parrilli M, Holst O, De Castro C. Identification and  
532 structural determination of the capsular polysaccharides from two *Acinetobacter*  
533 *baumannii* clinical isolates, MG1 and SMAL. *Carbohydr. Res.* 2011;346:973-7.
- 534 19. Oliveira H, Costa A, Ferreira A, Konstantinides N, Santos S, Boon M, et al. Functional  
535 analysis and antivirulence properties of a new depolymerase from a Myovirus that  
536 infects *Acinetobacter baumannii* capsule K45. *J. Virol.* 2019;93(4):e01163-18.
- 537 20. Oliveira H, Costa A, Konstantinides N, Ferreira A, Akturk E, Sillankorva S, et al. Ability  
538 of phages to infect *Acinetobacter calcoaceticus*-*Acinetobacter baumannii* complex  
539 species through acquisition of different pectate lyase depolymerase domains. . *Environ.*  
540 *Microbiol.* 2017;19(12):5060-77.
- 541 21. Russo TA, Beanan J, Olson R, MacDonald U, Cox A, St. Michael F, et al. The K1  
542 capsular polysaccharide from *Acinetobacter baumannii* is a potential therapeutic target  
543 via passive immunization. *Infect. Immun.* 2013;81(3):915-22.
- 544 22. Yang F, Lou T, Kuo S, Wu W, Chern J, Lee Y, et al. A medically relevant capsular  
545 polysaccharide in *Acinetobacter baumannii* is a potential vaccine candidate. *Vaccine.*  
546 2017;35(10):1440-7.
- 547 23. Hu D, Liu B, Dijkshoorn L, Wang L, Reeves PR. Diversity in the major polysaccharide  
548 antigen of *Acinetobacter baumannii* assessed by DNA sequencing, and development of a  
549 molecular serotyping scheme. *PLoS One.* 2013;8(7):e70329.
- 550 24. Kenyon JJ, Senchenkova SN, Shashkov AS, Shneider MM, Popova AV, Knirel YA, et  
551 al. K17 capsular polysaccharide produced by *Acinetobacter baumannii* isolate G7  
552 contains an amide of 2-acetamido-2-deoxy-D-galacturonic acid with D-alanine. *Int. J.*  
553 *Biol. Macromol.* 2019.

- 554 25. Kenyon JJ, Kasimova A, Shashkov AS, Hall RM, Knirel YA. *Acinetobacter baumannii*  
555 isolate BAL\_212 from Vietnam produces the K57 capsular polysaccharide containing a  
556 rarely occurring amino sugar N-acetylviuosamine. *Microbiol.* 2018;164:217-20.
- 557 26. Kasimova A, Kenyon JJ, Arbatsky NP, Shashkov AS, Popova AV, Shneider MM, *et al.*  
558 *Acinetobacter baumannii* K20 and K21 capsular polysaccharide structures establish roles  
559 for UDP-glucose dehydrogenase Ugd2, pyruvyl transferase Ptr2 and two  
560 glycosyltransferases. *Glycobiology.* 2018;28(11):876-84.
- 561 27. Kenyon JJ, Shashkov AS, Senchenkova SN, Shneider MM, Liu B, Popova AV, *et al.*  
562 *Acinetobacter baumannii* K11 and K83 capsular polysaccharides have the same 6-deoxy-  
563 L-talose-containing pentasaccharide K units but different linkages between the K units.  
564 *Int. J. Biol. Macromol.* 2017;103:648-55.
- 565 28. Kenyon JJ, Kasimova A, Shneider MM, Shashkov AS, Arbatsky NP, Popova AV, *et al.*  
566 The KL24 gene cluster and a genomic island encoding a Wzy polymerase contribute  
567 genes needed for synthesis of the K24 capsular polysaccharide by the multiply antibiotic  
568 resistant *Acinetobacter baumannii* isolate RCH51. *Microbiol.* 2017;163:355-63.
- 569 29. Kenyon JJ, Kasimova A, Notaro A, Arbatsky NP, Speciale I, Shashkov AS, *et al.*  
570 *Acinetobacter baumannii* K13 and K73 capsular polysaccharides differ only in K-unit  
571 side branches of novel non-2-ulosonic acids: di-N-acetylated forms of either  
572 acinetaminic acid or 8-epiacinetaminic acid. *Carbohydr Res.* 2017;452:149-55.
- 573 30. Kenyon JJ, Marzaioli AM, Hall RM, De Castro C. Structure of the K2 capsule associated  
574 with the KL2 gene cluster of *Acinetobacter baumannii*. *Glycobiology.* 2014;24(6):554-  
575 63.
- 576 31. Arbatsky NP, Kasimova A, Shashkov AS, Shneider MM, Popova AV, Shagin D, *et al.*  
577 Structure of the K128 capsular polysaccharide produced by *Acinetobacter baumannii*  
578 KZ-1093 from Kazakhstan. *Carbohydr. Res.* 2019;485:107814.
- 579 32. Arbatsky NP, Shneider MM, Dmitrenok A, Popova AV, Shagin D, Shelenkov A, *et al.*  
580 Structure and gene cluster of the K125 capsular polysaccharide from *Acinetobacter*  
581 *baumannii* MAR13-1452. *Int. J. Biol. Macromol.* 2018;117:1195-9.
- 582 33. Kasimova A, Shneider MM, Arbatsky NP, Popova AV, Shashkov AS, Miroshnikov KA,  
583 *et al.* Structure and gene cluster of the K93 capsular polysaccharide of *Acinetobacter*  
584 *baumannii* B11911 containing 5-N-Acetyl-7-N-[(R)-3-hydroxybutanoyl]pseudaminic  
585 acid. *Biochem(Mos).* 2017;82(4):483-9.
- 586 34. Senchenkova SN, Shashkov AS, Popova AV, Shneider MM, Arbatsky NP, Miroshnikov  
587 KA, *et al.* Structure elucidation of the capsular polysaccharide of *Acinetobacter*

- 588        *baumannii* AB5075 having the KL25 capsule biosynthesis locus. *Carbohydr. Res.*  
589        2015;408:8-11.
- 590    35. Shashkov AS, Kenyon JJ, Senchenkova SN, Shneider MM, Popova AV, Arbatsky NP, *et*  
591        *al.* *Acinetobacter baumannii* K27 and K44 capsular polysaccharides have the same K  
592        unit but different structures due to the presence of distinct *wzy* genes in otherwise closely  
593        related K gene clusters. *Glycobiology.* 2016;26(5):501-8.
- 594    36. Kenyon JJ, Hall RM, De Castro C. Structural determination of the K14 capsular  
595        polysaccharide from an ST25 *Acinetobacter baumannii* isolate, D46. *Carbohydr. Res.*  
596        2015;417:52-6.
- 597    37. Lees-Miller RG, Iwashkiw JA, Scott NE, Seper A, Vinogradov E, Schild S, *et al.* A  
598        common pathway for *O*-linked protein-glycosylation and synthesis of capsule in  
599        *Acinetobacter baumannii*. *Mol. Microbiol.* 2013;89(5):816-30.
- 600    38. Kenyon JJ, Holt KE, Pickard DJ, Dougan G, Hall RM. Insertions in the OCL1 locus of  
601        *Acinetobacter baumannii* lead to shortened lipooligosaccharides. *Res. Microbiol.*  
602        2014;165(6):472-5.
- 603    39. Kenyon JJ, Nigro SJ, Hall RM. Variation in the OC locus of *Acinetobacter baumannii*  
604        genomes predicts extensive structural diversity in the lipooligosaccharide. *PLoS One.*  
605        2014;9(9):e107833.
- 606    40. Meumann E, Anstey N, Currie B, Piera K, Kenyon JJ, Hall RM, *et al.* Genomic  
607        epidemiology of severe community-onset *Acinetobacter baumannii* infection. *Microb.*  
608        *Genom.* 2019;5.
- 609    41. Schultz MB, Thanh D, Hoan N, Wick RR, Ingle DJ, Hawkey J, *et al.* Repeated local  
610        emergence of carbapenem-resistant *Acinetobacter baumannii* in a single hospital ward.  
611        *Microb. Genom.* 2016;2(3):e000050.
- 612    42. Wright M, Haft D, Harkins D, Perez F, Hujer K, Bajaksouzian S, *et al.* New insights into  
613        dissemination and variation of the health care-associated pathogen *Acinetobacter*  
614        *baumannii* from genomic analysis. *mBio.* 2014;5(1):e00963-13
- 615    43. Adams M, Wright M, Karichu J, Venepally P, Fouts D, Chan A, *et al.* Rapid replacement  
616        of *Acinetobacter baumannii* strains accompanied by changes in lipooligosaccharide loci  
617        and resistance gene repertoire. *mBio.* 2019;10(2):e00356-19.
- 618    44. Wyres KL, Wick RR, Gorrie C, Jenney A, Follador R, Thomson N, *et al.* Identification  
619        of *Klebsiella* capsule synthesis loci from whole genome data. *Microb. Genom.* 2016;2.

- 620 45. Wick RR, Heinz E, Holt KE, Wyres KL. Kaptive Web: User-friendly capsule and  
621 lipopolysaccharide Serotype prediction for *Klebsiella* genomes. *J. Clin. Microbiol.*  
622 2018;56(6):e00197-18.
- 623 46. Bankevich A, Nurk S, Antipov D, Gurevich A, Dvorkin M, Kulikov A, *et al.* SPAdes: A  
624 new genome assembly algorithm and its applications to single-cell sequencing. *J Comput*  
625 *Biol.* 2012;19(5):455–77.
- 626 47. Wick RR, Judd LM, Gorrie CL, Holt KE. Unicycler: Resolving bacterial genome  
627 assemblies from short and long sequencing reads. *PLoS Comput. Biol.*  
628 2017;13(6):e1005595.
- 629 48. Kenyon JJ, Marzaioli AM, De Castro C, Hall RM. 5,7-Di-*N*-acetylacetaminic acid - a  
630 novel non-2-ulosonic acid found in the capsule of an *Acinetobacter baumannii* isolate.  
631 *Glycobiology.* 2015;25(6):644-54.
- 632 49. Arbatsky NP, Kenyon JJ, Shashkov AS, Shneider MM, Popova AV, Kalinchuk N, *et al.*  
633 The K5 capsular polysaccharide of the bacterium *Acinetobacter baumannii* SDF with the  
634 same K unit containing Leg5Ac7Ac as the K7 capsular polysaccharide but a different  
635 linkage between the K units. *Russ. Chem. Bull.* 2019;68(1):163-7.
- 636 50. Shashkov AS, Kenyon JJ, Arbatsky NP, Shneider MM, Popova AV, Miroshnikov KA, *et*  
637 *al.* Structures of three different neutral polysaccharide of *Acinetobacter baumannii*,  
638 NIPH190, NIPH201, and NIPH615, assigned to K30, K45, and K48 capsule types,  
639 respectively, based on capsule biosynthesis gene clusters. *Carbohydr. Res.* 2015;417:81-  
640 8.
- 641 51. Kenyon JJ, Shneider MM, Senchenkova SN, Shashkov AS, Siniagina M, Malanin S, *et*  
642 *al.* K19 capsular polysaccharide of *Acinetobacter baumannii* is produced via a Wzy  
643 polymerase encoded in a small genomic island rather than the KL19 capsule gene  
644 cluster. *Microbiology.* 2016;162:1479-89.
- 645 52. Shashkov AS, Kenyon JJ, Arbatsky NP, Shneider MM, Popova AV, Miroshnikov KA, *et*  
646 *al.* Related structures of neutral capsular polysaccharides of *Acinetobacter baumannii*  
647 isolates that carry related capsule gene clusters KL43, KL47, and KL88. *Carbohydr. Res.*  
648 2016;435:173-9.
- 649 53. Shashkov AS, Cahill SM, Arbatsky NP, Westacott AC, Kasimova A, Shneider MM, *et*  
650 *al.* *Acinetobacter baumannii* K116 capsular polysaccharide structure is a hybrid of the  
651 K14 and revised K37 structures. *Carbohydr. Res.* 2019;484: 107774.
- 652 54. Kenyon JJ, Arbatsky NP, Shneider MM, Popova AV, Dmitrenok AS, Kasimova AA, *et*  
653 *al.* The K46 and K5 capsular polysaccharides produced by *Acinetobacter baumannii*

- 654 NIPH 329 and SDF have related structures and the side-chain non-ulosonic acids are 4-  
655 O-acetylated by phage-encoded O-acetyltransferases. *PLoS One*. 2019;14(6):e0218461.
- 656 55. Arbatsky NP, Shneider MM, Kenyon JJ, Shashkov AS, Popova AV, Miroshnikov KA, *et*  
657 *al.* Structure of the neutral capsular polysaccharide of *Acinetobacter baumannii*  
658 NIPH146 that carries the KL37 capsule gene cluster. *Carbohydr. Res.* 2015;413:12-5.
- 659 56. Kenyon JJ, Notaro A, Hsu LY, De Castro C, Hall RM. 5,7-Di-N-acetyl-8-  
660 epiacinetaminic acid: A new non-2-ulosonic acid found in the K73 capsule produced by  
661 an *Acinetobacter baumannii* isolate from Singapore. *Sci. Rep.* 2017;7:11357.
- 662 57. Hamidian M, Hawkey J, Wick R, Holt KE, Hall RM. Evolution of a clade of  
663 *Acinetobacter baumannii* global clone 1, lineage 1 via acquisition of carbapenem- and  
664 aminoglycoside-resistance genes and dispersion of ISAba1. *Microb. Genom.*  
665 2019;5(1):e000242.
- 666 58. Carver T, Rutherford K, Berriman M, Rajandream M, Barrell B, Parkhill J. ACT: the  
667 Artemis Comparison Tool. *Bioinformatics*. 2005;21(16):3422-3.
- 668 59. Wick RR, Schultz MB, Zobel J, Holt KE. Bandage: interactive visualization of de novo  
669 genome assemblies. *Bioinformatics*. 2015;31(20):3350-2.
- 670

671 **TABLES**

672

673 **Table 1.** Gene nomenclature key for *A. baumannii* K and OC loci

674

| Gene name       | Predicted reaction product                        | Predicted protein                            |
|-----------------|---------------------------------------------------|----------------------------------------------|
| <b>K locus</b>  |                                                   |                                              |
| <i>aci</i>      | CMP- <u>A</u> cinetaminic acid derivative         | Multiple                                     |
| <i>atr</i>      | -                                                 | <u>A</u> cyl- or <u>A</u> cetyl- transferase |
| <i>alt</i>      | -                                                 | D- <u>A</u> lanine transferase               |
| <i>dga</i>      | UDP-2,3-diacetamido-2,3-dideoxy-D-glucuronic acid | Multiple                                     |
| <i>dmaA</i>     | UDP-2,3-diacetamido-2,3-dideoxy-D-mannuronic acid | 2-epimerase                                  |
| <i>ela</i>      | CMP-8-epilegionaminic acid derivative             | Multiple                                     |
| <i>fdt</i>      | dTDP-D-Fucp3NAc                                   | Multiple                                     |
| <i>fnl</i>      | dTDP-L-FucpNAc                                    | Multiple                                     |
| <i>fnr</i>      | UDP-D-FucpNAc                                     | UDP-6-deoxy-4-keto-D-GalpNAc 4-reductase     |
| <i>galU</i>     | UDP-D-Glcp                                        | UTP-glucose-1-phosphate uridylyltransferase  |
| <i>gdr</i>      | UDP-4-keto-6-deoxy-D-GlcpNAc                      | UDP-GlcpNAc 4,6-dehydratase                  |
| <i>gna</i>      | UDP-D-GlcpNAcA                                    | UDP-D-GlcpNAc dehydrogenase                  |
| <i>gne1</i>     | UDP-D-GalpNAc                                     | UDP-D-GlcpNAc epimerase                      |
| <i>gne2</i>     | UDP-D-GalpNAcA                                    | UDP-D-GlcpNAcA epimerase                     |
| <i>gpi</i>      | L-Fructose-6-phosphate                            | glucose-6-phosphate isomerase                |
| <i>gtr</i>      | -                                                 | <u>G</u> lycosyltransferase                  |
| <i>itr</i>      | -                                                 | <u>I</u> nitiating transferase               |
| <i>lga</i>      | CMP- <u>L</u> egionaminic acid derivative         | Multiple                                     |
| <i>man</i>      | GDP-D-mannose                                     | Multiple                                     |
| <i>mna</i>      | UDP-D-ManpNAc                                     | Multiple                                     |
| <i>neu</i>      | CMP-N-acetylneuraminic acid                       | Multiple                                     |
| <i>pet</i>      | -                                                 | <u>P</u> hosphoethanolamine transferase      |
| <i>pgm</i>      | D-Glucose-1-phosphate                             | Phosphoglucomutase                           |
| <i>pgt</i>      | -                                                 | <u>P</u> hosphoglycerol transferase          |
| <i>psa</i>      | CMP- <u>P</u> seudaminic acid derivative          | Multiple                                     |
| <i>ptr</i>      | -                                                 | <u>P</u> yruvyl transferase                  |
| <i>qdt</i>      | dTDP-D-Quip3NAc                                   | Multiple                                     |
| <i>qhb</i>      | UDP-D-QuipNAc4NHb                                 | Multiple                                     |
| <i>qnr</i>      | UDP-D-QuipNAc                                     | UDP-6-deoxy-4-keto-D-GlcpNAc 4-reductase     |
| <i>rml</i>      | dTDP-L-Rhamnose                                   | Multiple                                     |
| <i>tle</i>      | dTDP-6-deoxy-L-talose                             | dTDP-L-Rhamnose epimerase                    |
| <i>ugd</i>      | UDP-D-GlcpA                                       | <u>U</u> DP-D-Glcp dehydrogenase             |
| <i>vio</i>      | dTDP-4-acetamido-4,6-dideoxy-D-glucose            | Multiple                                     |
| <i>wza</i>      | -                                                 | Outer membrane protein                       |
| <i>wzb</i>      | -                                                 | Protein tyrosine phosphatase                 |
| <i>wzc</i>      | -                                                 | Protein tyrosine kinase                      |
| <i>wzx</i>      | -                                                 | Repeat unit translocase                      |
| <i>wzy</i>      | -                                                 | Repeat unit polymerase                       |
| <b>OC locus</b> |                                                   |                                              |
| <i>ahy</i>      | -                                                 | Predicted <u>a</u> cylhydrolase              |
| <i>gtrOC</i>    | -                                                 | <u>G</u> lycosyltransferase (outer core)     |
| <i>pda</i>      | UDP-D-GlcN                                        | <u>P</u> olysaccharide <u>d</u> eacetylase   |
| <i>ptrOC</i>    | -                                                 | <u>P</u> yruvyl transferase (outer core)     |
| <i>wecB</i>     | UDP-D-ManpNAc                                     | UDP-D-GlcpNAc C2 epimerase                   |

675

676

677

678

679



680 **Figure legends**

681 **Figure 1.** General arrangement of the surface polysaccharide synthesis loci in *A. baumannii*.  
682 KL and OCL boundaries are shown and flanking locus genes are coloured grey. Variable  
683 sequence portions are indicated by white boxes, and conserved genes at each locus are  
684 represented by coloured arrows. **A.** Organisation of the K locus with marked regions defining  
685 the roles of common modules. CPS export genes are orange and dark blue genes are involved  
686 in the synthesis of common sugar substrates. *gne1* is not always present but is often critical to  
687 the synthesis of many CPS structures. **B.** Organisation of the two groups (A and B) of the  
688 OC locus with marked regions defining conserved or variable portions. Green genes encode  
689 conserved glycosyltransferases and light blue are those involved in complex sugar synthesis  
690

691 **Figure 2.** Closely related capsule biosynthesis gene clusters demonstrating cases of small  
692 genetic replacements. Genes are represented by arrows oriented in the direction of  
693 transcription that are coloured according to the scheme shown below. Shading between gene  
694 clusters indicates regions of >95% nucleotide sequence identity (dark grey) or 90-95%  
695 nucleotide sequence identity (light grey). Figure drawn to scale using GenBank accession  
696 numbers listed in Table S1. **A.** KL63 and KL108 gene clusters differing in *wzy* sequence. **B.**  
697 KL1 and KL107 are an example of *gne1* presence vs. absence. **C.** KL13, KL73, KL12, and  
698 KL110 are examples of several closely related gene clusters with small sequence  
699 replacements altering the synthesis pathway of a complex sugar substrate, or topology of the  
700 CPS structure.

701

702 **Figure 3.** Breakdown of confidence levels for *Kaptive* locus calls using the *A. baumannii* KL  
703 and OCL databases. **A.** Results following database quality checking using private collection  
704 of 680 *A. baumannii* genome assemblies (Dataset 2). Colour key is shown in the top right  
705 corner. **B.** Results of applying the databases to 3412 genome assemblies available in NCBI  
706 databases (Dataset 3). Colour key is shown in the top right corner.

707

708 **Figure 4. Distribution of K and OC loci by sequence type.** Heat maps show the  
709 distribution of distinct K (**A**) and OC (**B**) loci among genomes assigned to nine common  
710 multi-locus sequence types (STs). Coloured shading indicates the percentage of isolates  
711 belonging to a given ST that were assigned a given K or OC locus type, as indicated by the  
712 colour legend. *A. baumannii* genome assemblies were retrieved from the NCBI database;  
713 only confirmed *A. baumannii* for which both K and OC loci were assigned by *Kaptive* with

714 confidence level “Good” or better are shown (n = 2002; 125 ST1, 1669 ST2, 46 ST10, 20  
715 ST16, 43 ST25, 28 ST78, 22 ST406, 29 ST499, 20 ST636).

**A.****K LOCUS**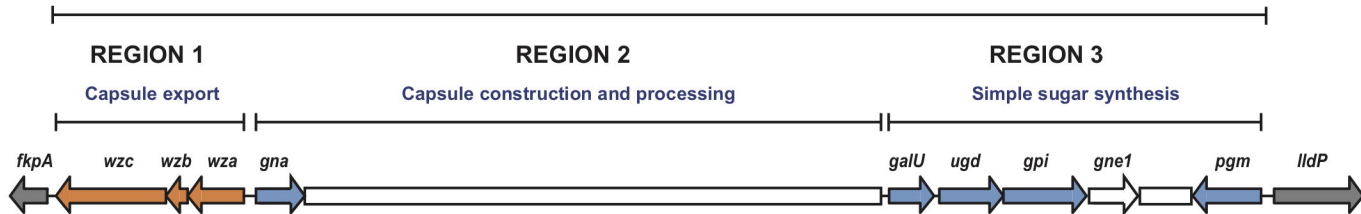**B.****OC LOCUS**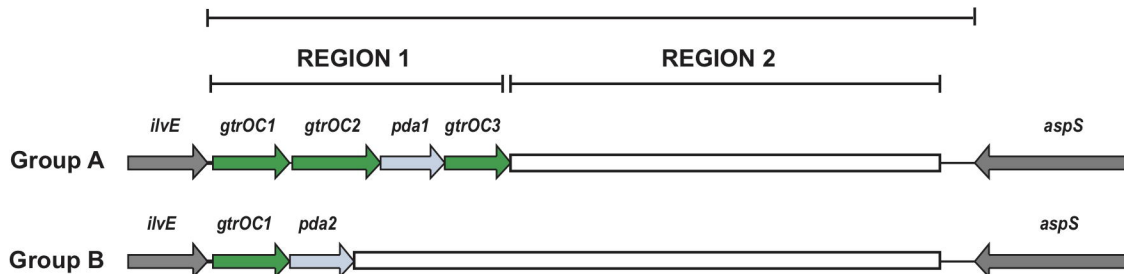

**A.**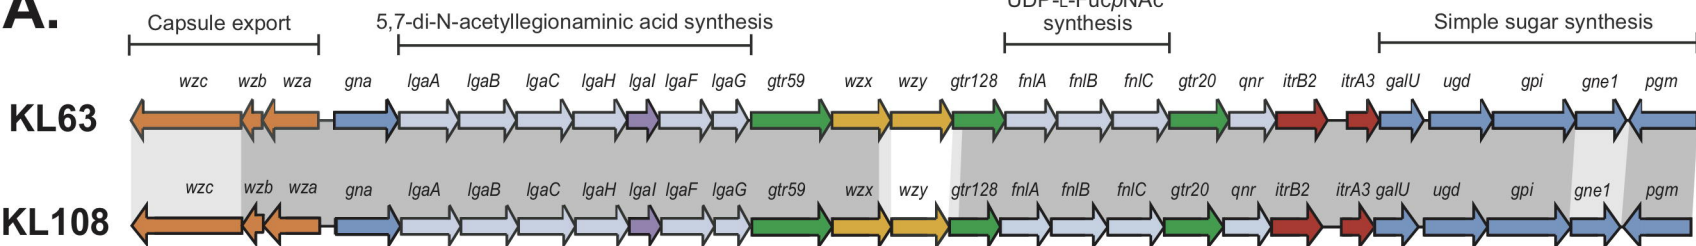**B.**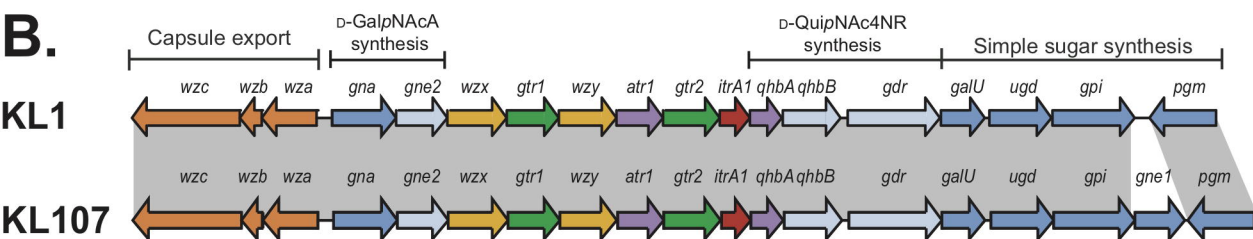**C.**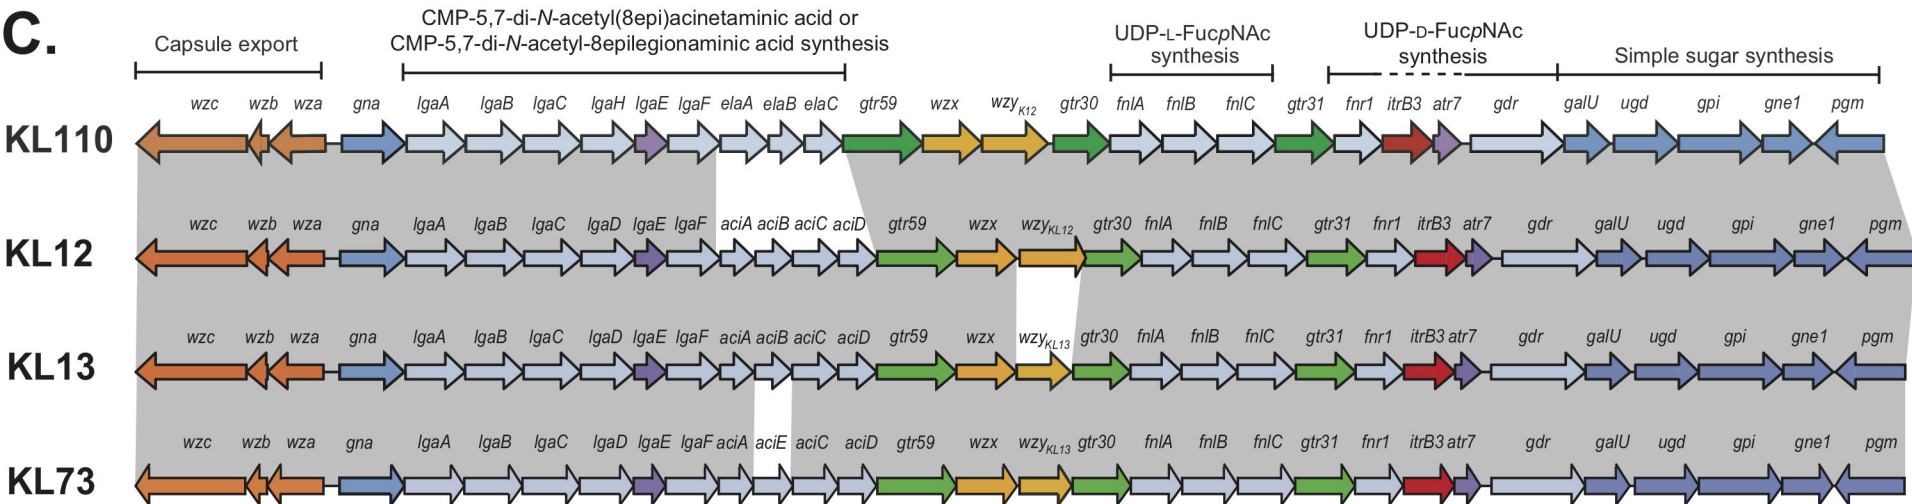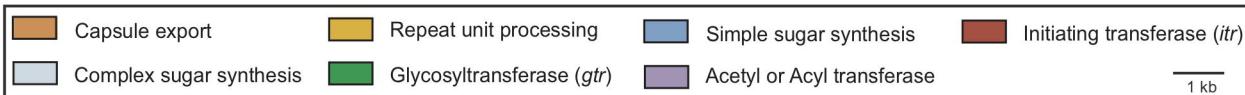

**A.**

bioRxiv preprint doi: <https://doi.org/10.1101/869370>; this version posted December 10, 2019. The copyright holder for this preprint (which was not certified by peer review) is the author/funder, who has granted bioRxiv a license to display the preprint in perpetuity. It is made available under aCC-BY 4.0 International license.

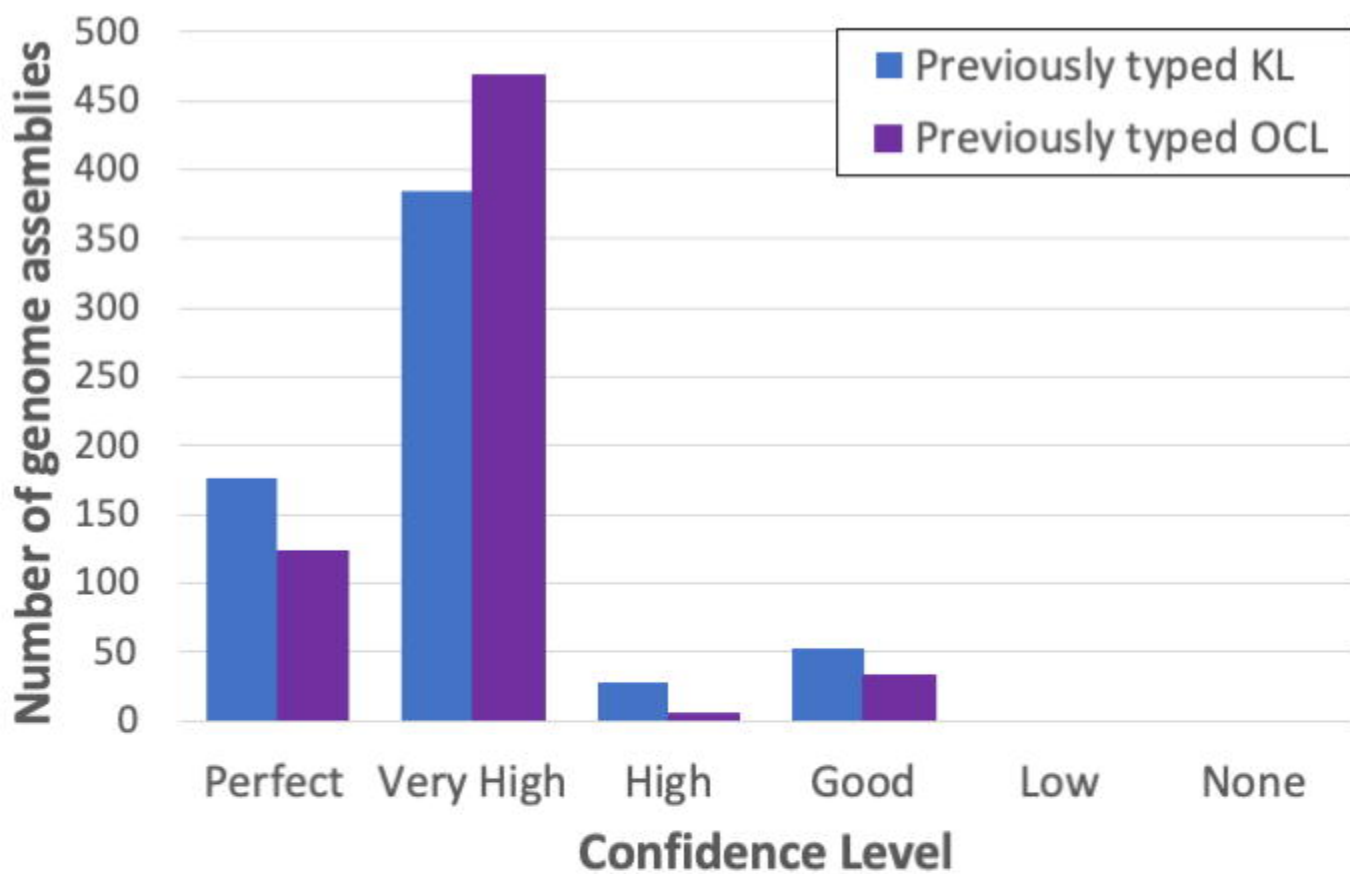**B.**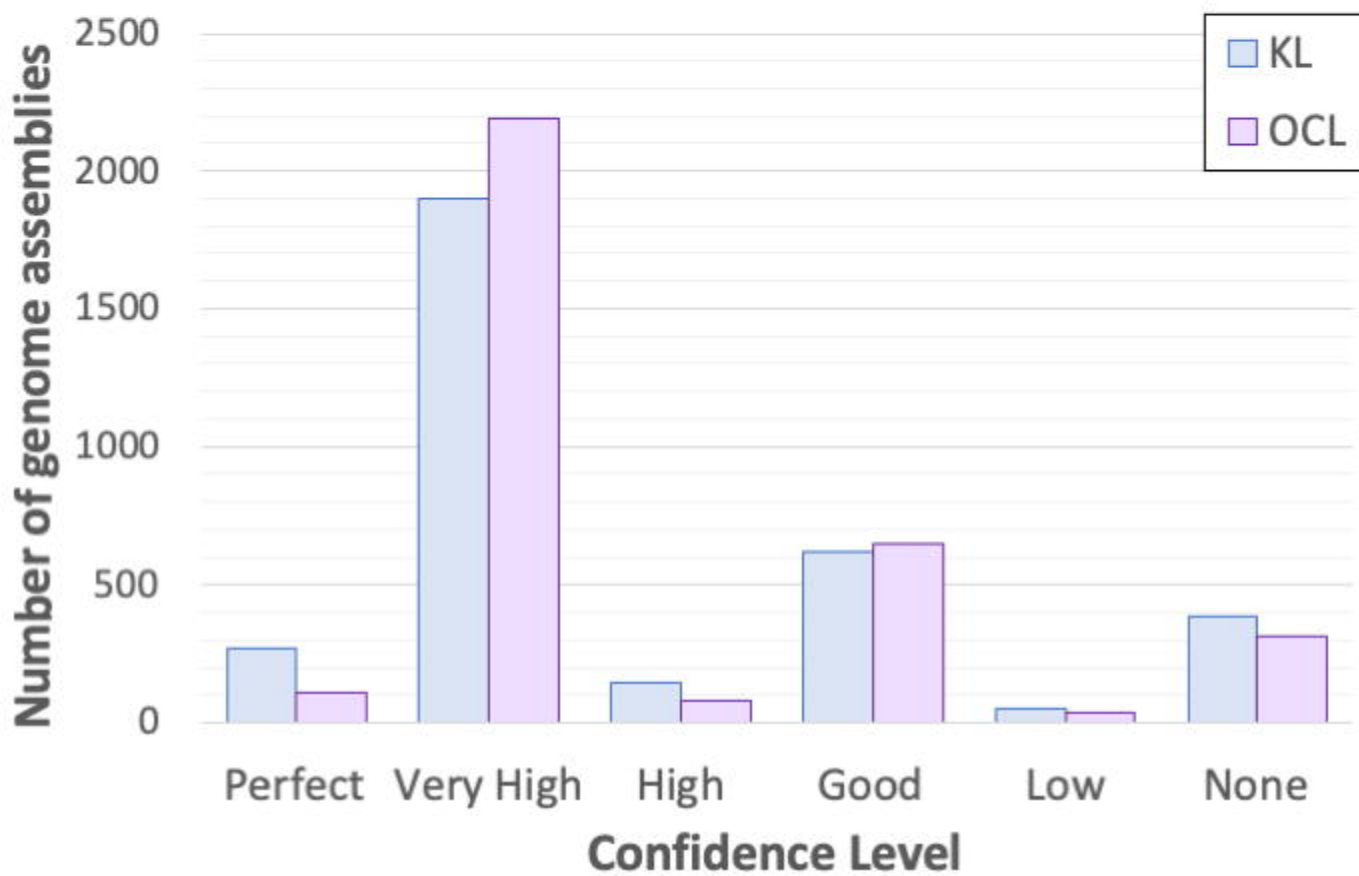

A.

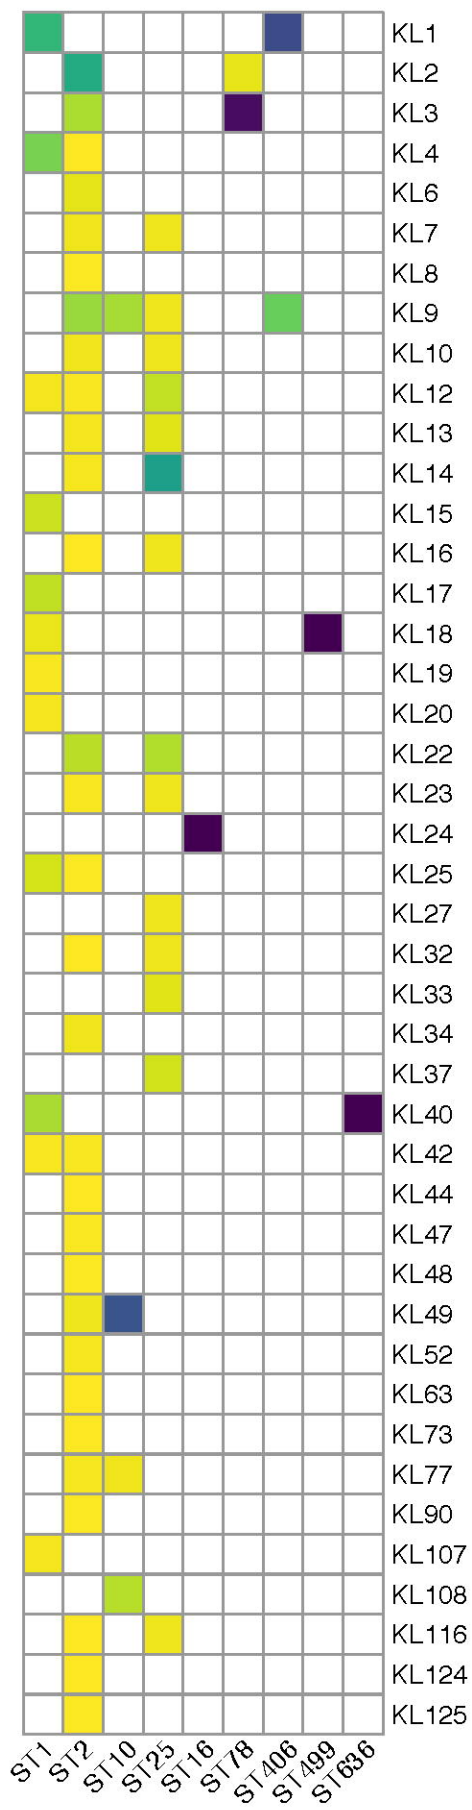

B.

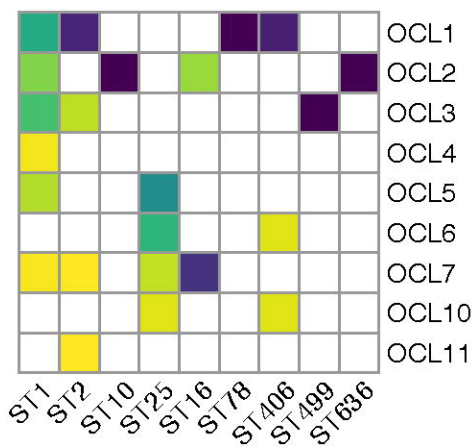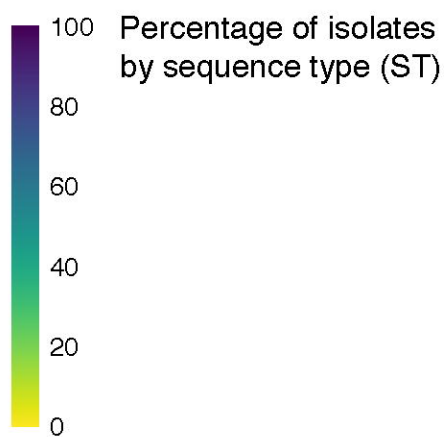

Source: https://www.biorxiv.org/content/10.1101/869370v1.full.pdf
